# Supplementary material for: Genomic Signatures from Clinical Tumor Sequencing in Patients with Breast Cancer Having Germline BRCA1/2 Mutation
Source: PubMed Central journal article supplement — Cancer Res Treat. 2022 Jun 8;55(1):155–66. doi: 10.4143/crt.2021.1567 (PMC9873314; doi:10.4143/crt.2021.1567), 2022-06-08
Supplement: crt-2021-1567-S1-Table.pdf [file crt-2021-1567-S1-Table.pdf]

**S1 Table.** Differences in tumor tissue NGS results of the *gBRCA1/2p* and *gBRCA1/2w* groups

|              | TMB                 |                    | SNV                 |                  | CNV                 |                  | Fusion              |                  |
|--------------|---------------------|--------------------|---------------------|------------------|---------------------|------------------|---------------------|------------------|
|              | <i>gBRCA1/2p</i>    | <i>gBRCA1/2w</i>   | <i>gBRCA1/2p</i>    | <i>gBRCA1/2w</i> | <i>gBRCA1/2p</i>    | <i>gBRCA1/2w</i> | <i>gBRCA1/2p</i>    | <i>gBRCA1/2w</i> |
| Mean (SD)    | 10.21 (4.61)        | 13.47 (5.78)       | 14.81 (4.95)        | 18.86 (18.44)    | 5.77 (4.61)         | 5.47 (6.87)      | 0.27 (0.47)         | 0.23 (0.43)      |
| Median (IQR) | 10.45 (6.89-13.17)  | 12.68 (9.75-16.37) | 14 (12-17.75)       | 16 (12-19.5)     | 5 (1.5-9.75)        | 3 (1-7.5)        | 0 (0-0.75)          | 0 (0-0)          |
| p-value      | 0.017 <sup>a)</sup> |                    | 0.278 <sup>a)</sup> |                  | 0.343 <sup>b)</sup> |                  | 0.740 <sup>b)</sup> |                  |

CNV, copy number variant; IQR, interquartile range; NGS, next-generation sequencing; SD, standard deviation; SNV, single-nucleotide variant; TMB, tumor mutation burden. <sup>a)</sup>By Student's t test, <sup>b)</sup>By Mann-Whitney U test.
