# Supplementary material for: Genomic Signatures from Clinical Tumor Sequencing in Patients with Breast Cancer Having Germline BRCA1/2 Mutation
Source: PubMed Central journal article supplement — Cancer Res Treat. 2022 Jun 8;55(1):155–66. doi: 10.4143/crt.2021.1567 (PMC9873314; doi:10.4143/crt.2021.1567), 2022-06-08
Supplement: crt-2021-1567-S2-Table.pdf [file crt-2021-1567-S2-Table.pdf]

**S2 Table.** Differences in number of HR-related gene aberrations between the *gBRCA1/2p* and *gBRCA1/2w* groups

|              | HR-related gene aberration |                  | Non- <i>BRCA1/2</i> HR-related gene aberration |                  |
|--------------|----------------------------|------------------|------------------------------------------------|------------------|
|              | <i>gBRCA1/2p</i>           | <i>gBRCA1/2w</i> | <i>gBRCA1/2p</i>                               | <i>gBRCA1/2w</i> |
| Mean (SD)    | 2.00 (1.23)                | 1.65 (1.43)      | 0.54 (0.71)                                    | 1.26 (1.26)      |
| Median (IQR) | 2 (1-2)                    | 1 (1-2)          | 0 (0-1)                                        | 1 (0-2)          |
| p-value      | 0.156 <sup>a)</sup>        |                  | 0.008 <sup>a)</sup>                            |                  |

HR, homologous recombination; IQR, interquartile range; SD, standard deviation. <sup>a)</sup>By Mann-Whitney U test.
