# Supplementary material for: Genomic Signatures from Clinical Tumor Sequencing in Patients with Breast Cancer Having Germline BRCA1/2 Mutation
Source: PubMed Central journal article supplement — Cancer Res Treat. 2022 Jun 8;55(1):155–66. doi: 10.4143/crt.2021.1567 (PMC9873314; doi:10.4143/crt.2021.1567), 2022-06-08
Supplement: crt-2021-1567-S3-Table.pdf [file crt-2021-1567-S3-Table.pdf]

**S3 Table.** Mutation profile of non-*BRCA1/2* HR-related genes in the *gBRCA1/2p* and *gBRCA1/2w* groups

| HR gene       | <i>gBRCA1/2</i> pathogenicity | Nucleotide change | AA change     | Function                | VAF (%) or CNV |
|---------------|-------------------------------|-------------------|---------------|-------------------------|----------------|
| <i>ARID1A</i> | w                             | c.4196A>C         | Q1399P        | Nonsynonymous SNV       | 58.6           |
|               | w                             | c.4793G>A         | R1598H        | Nonsynonymous SNV       | 63.01          |
|               | w                             | c.6791C>G         | S2264X        | Stopgain SNV            | 49.8           |
|               | w                             | c.3977_3978insGCA | P1326delinsPQ | Nonframeshift insertion | 51.82          |
|               | w                             | c.2465A>G         | N822S         | Nonsynonymous SNV       | 64.84          |
|               | w                             | c.908G>C          | S303T         | Nonsynonymous SNV       | 56.39          |
|               | w                             | c.3634C>T         | Q1212X        | Stopgain SNV            | 3.97           |
|               | w                             | c.5766G>C         | L1922F        | Nonsynonymous SNV       | 34.52          |
| <i>ATM</i>    | p                             | c.5369A>G         | D1790G        | Nonsynonymous SNV       | 0.96           |
|               | w                             | c.37C>T           | R13C          | Nonsynonymous SNV       | 42.92          |
|               | w                             | c.5063T>C         | I1688T        | Nonsynonymous SNV       | 76.59          |
|               | p                             | c.818A>G          | D273G         | Nonsynonymous SNV       | 32.72          |
| <i>ATRX</i>   | w                             | c.3175G>A         | E1059K        | Nonsynonymous SNV       | 27.66          |
|               | w                             | c.6557C>A         | S2186Y        | Nonsynonymous SNV       | 3.47           |
|               | w                             | c.853G>C          | E285Q         | Nonsynonymous SNV       | 23.69          |
|               | w                             | c.1492A>G         | R498G         | Nonsynonymous SNV       | 33.77          |
|               | p                             | c.5974_5976del    | 1992_1992del  | Nonframeshift deletion  | 41.82          |
| <i>BARD1</i>  | w                             | c.2143C>T         | Q715X         | Stopgain SNV            | 74.66          |
| <i>BLM</i>    | p                             | c.178T>A          | L60I          | Nonsynonymous SNV       | 81.69          |
|               | w                             | c.178T->A         | L60I          | Nonsynonymous SNV       | 41.92          |
|               | w                             | c.2744C>T         | A915V         | Nonsynonymous SNV       | 48.94          |
|               | w                             | c.3422A>G         | N1141S        | Nonsynonymous SNV       | 42.48          |
|               | w                             | c.635C>T          | S212F         | Nonsynonymous SNV       | 3.08           |
|               | w                             | c.1536delA        | G512fs        | Frameshift deletion     | 1.16           |
|               | p                             | c.3427G>A         | E1143K        | Nonsynonymous SNV       | 46.3           |
| <i>BRIP1</i>  | w                             |                   | AMP           | Amp.                    | 5.76           |
|               | w                             |                   | AMP           | Amp.                    | 8.42           |

|               |   |                 |              |                         |       |
|---------------|---|-----------------|--------------|-------------------------|-------|
|               | p | c.2440C>T       | R814C        | Nonsynonymous SNV       | 49.42 |
|               | w | c.1267G>C       | D423H        | Nonsynonymous SNV       | 3.69  |
|               | w | c.3241_3242insT | A1081fs      | Frameshift insertion    | 17.98 |
|               | w |                 | AMP          | Amp.                    | 5.62  |
|               | w | c.2440C>T       | R814C        | Nonsynonymous SNV       | 65.17 |
|               | w | c.2830C>G       | Q944E        | Nonsynonymous SNV       | 40.5  |
|               | w | c.2854A>G       | I952V        | Nonsynonymous SNV       | 65.51 |
|               | w | c.787C>T        | L263F        | Nonsynonymous SNV       | 51.3  |
|               | w | c.1328G>A       | C443Y        | Nonsynonymous SNV       | 47.67 |
|               | w |                 | AMP          | Amp.                    | 4.66  |
| <i>CHEK2</i>  | w | c.751delG       | D251fs       | Frameshift deletion     | 30.37 |
|               | w | c.546C>A        | Y182*        | Stopgain SNV            | 39.93 |
| <i>FANCA</i>  | w | c.2546delC      | S849fs       | Frameshift deletion     | 22.79 |
|               | w | c.913C>T        | H305Y        | Nonsynonymous SNV       | 43.93 |
|               | w | c.596+2T>C      | splicing     | Splicing                | 38.33 |
|               | p | c.2395C>T       | P799S        | Nonsynonymous SNV       | 50.7  |
| <i>FANCD2</i> | p | c.1318C>T       | Q440X        | Stopgain SNV            | 28.61 |
|               | w | c.355C>T        | R119C        | Nonsynonymous SNV       | 48.53 |
|               | w | c.943C>T        | R315W        | Nonsynonymous SNV       | 44.87 |
| <i>FANCE</i>  | w | c.565G>C        | E189Q        | Nonsynonymous SNV       | 2.68  |
| <i>FANCG</i>  | p | c.722C>T        | P241L        | Nonsynonymous SNV       | 47.33 |
|               | w | c.376_377insGTC | L126delinsVL | Nonframeshift insertion | 44.82 |
|               | p | c.464G>A        | R155H        | Nonsynonymous SNV       | 40.93 |
| <i>MRE11A</i> | w | c.1715G>A       | R572Q        | Nonsynonymous SNV       | 47.01 |
| <i>NBN</i>    | w | c.388C>G        | Q130E        | Nonsynonymous SNV       | 2.6   |
|               | w |                 | AMP          | Amp.                    | 7.9   |
|               | p |                 | AMP          | Amp.                    | 4.73  |
|               | p |                 | AMP          | Amp.                    | 4.52  |
|               | w |                 | AMP          | Amp.                    | 7.36  |
| <i>PALB2</i>  | w | c.1873G>A       | E625K        | Nonsynonymous SNV       | 1.68  |
|               | w | c.3054G>C       | E1018D       | Nonsynonymous SNV       | 36.7  |
|               | w | c.2608_2609insC | V870fs       | Frameshift              | 39.89 |

|               |   |                 |              |                                   |       |
|---------------|---|-----------------|--------------|-----------------------------------|-------|
|               | w | c.3054G>C       | E1018D       | insertion<br>Nonsynonymous<br>SNV | 40.98 |
|               | p | c.1379A>G       | Q460R        | Nonsynonymous<br>SNV              | 56.28 |
| <i>RAD50</i>  | w | c.2165_2166insT | K722fs       | Frameshift<br>insertion           | 16.09 |
|               | w | c.3096_3097del  | 1032_1033del | Frameshift deletion               | 6.95  |
|               | p | c.1094G>A       | R365Q        | Nonsynonymous<br>SNV              | 43.85 |
|               | w | c.3790C>T       | L1264F       | Nonsynonymous<br>SNV              | 45.57 |
|               | w | c.353T>C        | I118T        | Nonsynonymous<br>SNV              | 38.06 |
| <i>RAD51</i>  | w | c.452G>A        | R151Q        | Nonsynonymous<br>SNV              | 69.75 |
| <i>RAD51B</i> | w | c.157C>G        | L53V         | Nonsynonymous<br>SNV              | 11.18 |

---

Amp., amplification; AA, amino acid; CNV, copy number variant; HR, homologous recombination; SNV, single-nucleotide variant; VAF, variant allele frequency.
