# Supplementary material for: Genomic Signatures from Clinical Tumor Sequencing in Patients with Breast Cancer Having Germline BRCA1/2 Mutation
Source: PubMed Central journal article supplement — Cancer Res Treat. 2022 Jun 8;55(1):155–66. doi: 10.4143/crt.2021.1567 (PMC9873314; doi:10.4143/crt.2021.1567), 2022-06-08
Supplement: crt-2021-1567-S4-Fig..pdf [file crt-2021-1567-S4-Fig..pdf]

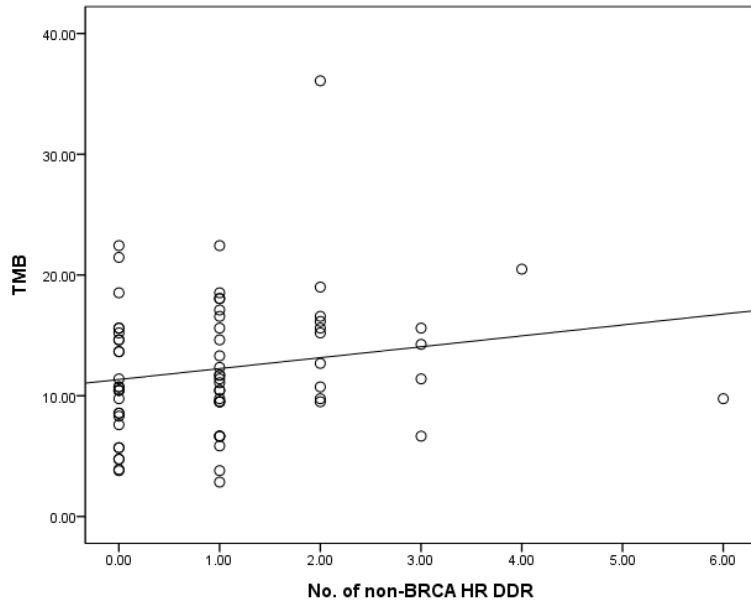

**S4 Fig.** Tumor mutation burden correlated with the number of non-*BRCA* homologous recombination DNA damage repair (HR-DDR) genes. Spearman's correlation analysis showed a linear correlation (coefficient=0.221) with marginal p-value ( $p=0.068$ ) between tumor mutation burden (TMB) value and number of non-*BRCA1/2* HR-related gene aberrations.
