# Supplementary material for: Genomic Signatures from Clinical Tumor Sequencing in Patients with Breast Cancer Having Germline BRCA1/2 Mutation
Source: PubMed Central journal article supplement — Cancer Res Treat. 2022 Jun 8;55(1):155–66. doi: 10.4143/crt.2021.1567 (PMC9873314; doi:10.4143/crt.2021.1567), 2022-06-08
Supplement: crt-2021-1567-S6-Table.pdf [file crt-2021-1567-S6-Table.pdf]

**S6 Table.** SNVs according to number of non-*BRCA1/2* HR-related gene aberrations

| Non- <i>BRCA1/2</i> HR-related gene aberrations | 0     | 1     | $\geq 2$ | p-value <sup>a)</sup> |
|-------------------------------------------------|-------|-------|----------|-----------------------|
| Mean                                            | 14.15 | 14.77 | 26.88    | 0.002                 |
| SD                                              | 4.70  | 5.49  | 28.20    |                       |
|                                                 | a     | a     | b        |                       |

HR, homologous recombination; SD, standard deviation. <sup>a)</sup>p-value by Kruskal–Wallis test. a, b: Different letters indicate statistically significant differences between multiple comparisons ( $p < 0.05$ ).
