# Supplementary material for: Genomic Signatures from Clinical Tumor Sequencing in Patients with Breast Cancer Having Germline BRCA1/2 Mutation
Source: PubMed Central journal article supplement — Cancer Res Treat. 2022 Jun 8;55(1):155–66. doi: 10.4143/crt.2021.1567 (PMC9873314; doi:10.4143/crt.2021.1567), 2022-06-08
Supplement: crt-2021-1567-S7-Table.pdf [file crt-2021-1567-S7-Table.pdf]

**S7 Table.** TMB and SNV according to HR-DDR gene aberration

|               | Aberration detected |       |       | Aberration undetected |       |       | p-value |
|---------------|---------------------|-------|-------|-----------------------|-------|-------|---------|
|               | No.                 | Mean  | SD    | No.                   | Mean  | SD    |         |
| <b>TMB</b>    |                     |       |       |                       |       |       |         |
| <i>ARID1A</i> | 7                   | 12.32 | 3.83  | 62                    | 12.23 | 5.75  | 0.969   |
| <i>ATM</i>    | 4                   | 10.42 | 1.00  | 65                    | 12.35 | 5.72  | 0.505   |
| <i>ATRX</i>   | 4                   | 11.6  | 6.09  | 65                    | 5.58  | 5.58  | 0.814   |
| <i>BLM</i>    | 7                   | 13.17 | 4.99  | 62                    | 12.13 | 5.66  | 0.645   |
| <i>BRCA1</i>  | 16                  | 9.32  | 4.32  | 53                    | 13.12 | 5.63  | 0.016*  |
| <i>BRCA2</i>  | 20                  | 12.17 | 4.51  | 49                    | 12.27 | 5.99  | 0.974   |
| <i>BRIP1</i>  | 11                  | 14.72 | 3.38  | 58                    | 11.76 | 5.79  | 0.107   |
| <i>FANCA</i>  | 4                   | 16.62 | 2.69  | 65                    | 11.97 | 5.60  | 0.105   |
| <i>FANCG</i>  | 3                   | 24.26 | 11.03 | 66                    | 11.69 | 4.66  | 0.186   |
| <i>NBN</i>    | 5                   | 8.17  | 2.19  | 64                    | 12.56 | 5.63  | 0.09    |
| <i>PALB2</i>  | 5                   | 10.01 | 4.60  | 64                    | 12.41 | 5.63  | 0.357   |
| <i>RAD50</i>  | 5                   | 10.69 | 3.09  | 64                    | 12.36 | 5.71  | 0.523   |
| <b>SNV</b>    |                     |       |       |                       |       |       |         |
| <i>ARID1A</i> | 7                   | 29.71 | 44.46 | 62                    | 15.94 | 5.88  | 0.444   |
| <i>ATM</i>    | 4                   | 14.25 | 5.12  | 65                    | 17.52 | 15.33 | 0.674   |
| <i>ATRX</i>   | 4                   | 48.25 | 55.13 | 65                    | 15.43 | 5.57  | 0.319   |
| <i>BLM</i>    | 7                   | 18.14 | 8.32  | 62                    | 17.24 | 15.55 | 0.881   |
| <i>BRCA1</i>  | 16                  | 15.06 | 5.35  | 53                    | 18.02 | 16.77 | 0.492   |
| <i>BRCA2</i>  | 20                  | 21.9  | 26    | 49                    | 15.47 | 6.01  | 0.287   |
| <i>BRIP1</i>  | 11                  | 18.64 | 6     | 58                    | 17.09 | 16.1  | 0.755   |
| <i>FANCA</i>  | 4                   | 23    | 7.35  | 65                    | 16.98 | 15.24 | 0.438   |
| <i>FANCG</i>  | 3                   | 22    | 6.08  | 66                    | 17.12 | 15.2  | 0.584   |
| <i>NBN</i>    | 5                   | 16.8  | 8.87  | 64                    | 17.38 | 15.35 | 0.935   |
| <i>PALB2</i>  | 5                   | 41.8  | 49.63 | 64                    | 15.42 | 5.75  | 0.3     |
| <i>RAD50</i>  | 5                   | 13    | 3.08  | 64                    | 17.67 | 15.44 | 0.505   |

HR-DDR, homologous recombination DNA damage repair; SD, standard deviation; SNV, single-nucleotide variant; TMB, tumor mutation burden.
